# Supplementary material for: Stable large area organic solar cells realized by using random terpolymers donors combined with a ternary blend
Source: Royal Society of Chemistry journal article supplement (doi:10.1039/c9ta03188j), 2019-01-01
Supplement: c9ta03188j1.pdf [file c9ta03188j1.pdf]

## Supporting Information

### **Stable large area organic solar cells realized by using random terpolymers donors combined with a ternary blend**

Xiaopeng Xu,<sup>a</sup> Zhaozhao Bi,<sup>b</sup> Wei Ma,<sup>b,\*</sup> Guangjun Zhang,<sup>a</sup> He Yan,<sup>c,\*</sup> Ying Li,<sup>a</sup> and Qiang

Peng<sup>a,\*</sup>

<sup>a</sup> Key Laboratory of Green Chemistry and Technology of Ministry of Education, College of Chemistry and State Key Laboratory of Polymer Materials Engineering, Sichuan University, Chengdu 610064, P. R. China

<sup>b</sup> State Key Laboratory for Mechanical Behavior of Materials, Xi'an Jiaotong University, Xi'an 710049, P. R. China

<sup>c</sup> Department of Chemistry and Hong Kong Branch of Chinese National Engineering Research Center for Tissue Restoration & Reconstruction, Hong Kong University of Science and Technology, Clear Water Bay, Kowloon, Hong Kong SAR, 999077

\*To whom correspondence should be addressed: Tel: +86-28-86510868; fax: +86-28-86510868;

e-mail: msewma@mail.xjtu.edu.cn; hyan@ust.hk; qiangpengjohnny@yahoo.com

## 1. Materials and methods

**Materials:** ITCPTC was purchased from Derthon Optoelectronic Materials Science Technology. The terpolymers of PT1, PT3 and PT5, and the small molecular acceptor of meta-TrBRCN were synthesized according to our previously reports.<sup>1,2</sup> All the other chemicals were purchased from Aladdin, Adamas, Sigma-Aldrich, and Alfa Aesar Chemical Co., and used without further purification. All solvents were freshly distilled immediately prior to use.

**Methods:** UV-vis spectra were obtained on a Hitachi U2910 spectrophotometer. The UPS measurements were conducted on a Thermo Scientific ESCALAB 250Xi photoelectron spectroscope. 2D-GIWAXS measurements were performed at beamline 7.3.3 8 at the Advanced Light Source. Samples were prepared on the Si substrates using identical blend solutions as those used in PSC devices. The 10 keV X-ray beam was incident at a grazing angle of 0.12°-0.16°, selected to maximize the scattering intensity from the samples. The scattered X-rays were detected using a Dectris Pilatus 2M photon counting detector. R-SoXS transmission measurements were performed at beamline 11.0.1.2 at the Advanced Light Source (ALS). AFM images were obtained by using a Bruker Inova atomic microscope in tapping mode. Charge carrier mobilities were tested using the SCLC method, which is described by  $J=9\varepsilon_0\varepsilon_r\mu V^2/8L^3$ .  $J$  is the current density,  $L$  is the film thickness of the active layer,  $\mu$  is the hole or electron mobility,  $\varepsilon_r$  is the relative dielectric constant of the transport medium,  $\varepsilon_0$  is the permittivity of free space ( $8.85\times 10^{-12}$  F m<sup>-1</sup>),  $V$  is the internal voltage in device and  $V = V_{appl} - V_{bi} - V_a$ , where  $V_{appl}$  is the applied voltage to the device,  $V_{bi}$  is the built-in

voltage and  $V_a$  is the voltage drop.

## 2. Device fabrication and measurement

The patterned indium tin oxide (ITO, sheet resistance =  $15 \Omega \text{ square}^{-1}$ ) glass substrates were sequentially ultrasonicated with detergent, deionized water, acetone and isopropanol. Then, the ITO glasses were treated with UV for 30 min in a UV-ozone chamber. The zinc oxide (ZnO) precursor solution (diethylzinc solution 2M in toluene, diluted by tetrahydrofuran) was spin-coated on the surface of ITO substrate at a spinning rate of 5000 rpm for 30 s in dry air followed by baked in dried air at  $180^\circ\text{C}$  for 30 min to form a thin ZnO film ( $\sim 30 \text{ nm}$ ) as an electron extraction layer. The terpolymer:ITCPTC<sub>x</sub>:meta-TrBRCN<sub>(1-x)</sub> solution (1:x:(1-x), w/w, 20 mg/mL in chlorobenzene) was prepared and stirred overnight before used and 0.5 v% of DIO was used as the solvent additive. The active blend solution was spin-coated on the top of ZnO layer at a speed of 2000 rpm for 60 s to form a 100 nm thickness of active layer. A molybdenum trioxide (MoO<sub>3</sub>, 10 nm) and a silver anode (Ag, 100 nm) were finally deposited onto the top of the active layer in an evaporation chamber under high vacuum ( $\leq 10^{-6}$  mbar). The device area was exactly fixed at  $4.00 \text{ mm}^2$  for small area devices and  $1.0 \text{ cm}^2$  for large area devices. The  $I$ - $V$  characterization was performed on a computer-controlled Keithley 2400 Source under AM1.5G ( $100 \text{ mW cm}^{-2}$ ) using a solar simulator (XES-70S1, SAN-EI), which was calibrated by a standard Si solar cell (AK-200, Konica Minolta, INC.). The EQE values were measured with a Newport QE test Model 77890 (Newport Co. Ltd.) during illumination with monochromatic light from a xenon lamp. All fabrication and characterization processes, except for the ZnO

layer preparation and EQE measurements, were conducted in a high purity argon filled glove box (<0.1 ppm O<sub>2</sub> and H<sub>2</sub>O).

### 3. Supplementary figures

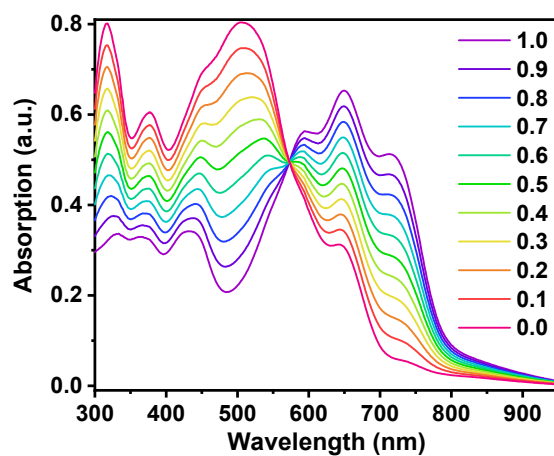

**Fig. S1** UV-vis absorption spectra of PT1:ITCPTC<sub>x</sub>:meta-TrBRCN<sub>(1-x)</sub> blends.

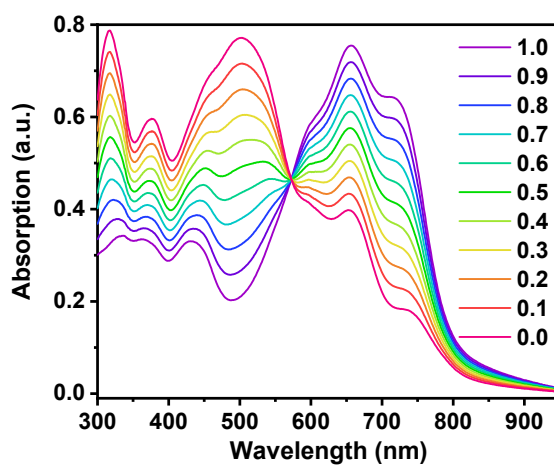

**Fig. S2** UV-vis absorption spectra of PT3:ITCPTC<sub>x</sub>:meta-TrBRCN<sub>(1-x)</sub> blends.

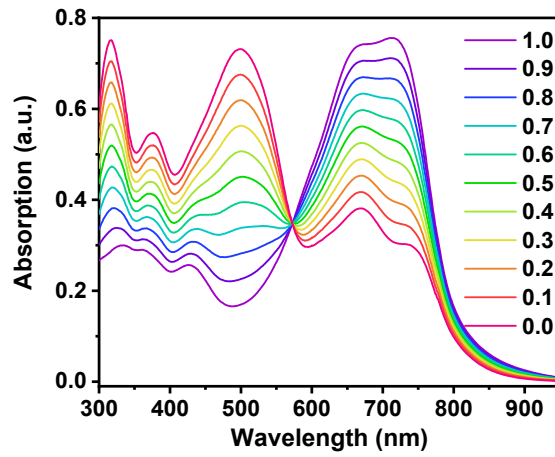

Fig. S3 UV-vis absorption spectra of PT5:ITCPTC<sub>x</sub>:meta-TrBRCN<sub>(1-x)</sub> blends.

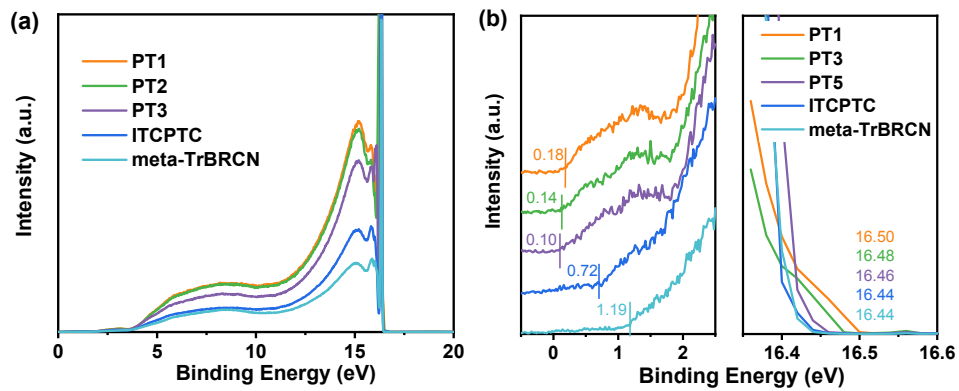

Fig. S4 UPS spectra of the terpolymers and the acceptor materials.

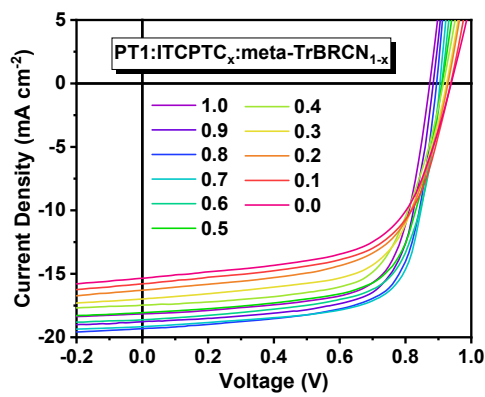

Fig. S5  $J$ - $V$  curves of the PT1:ITCPTC<sub>x</sub>:meta-TrBRCN<sub>1-x</sub> based ternary blend devices.

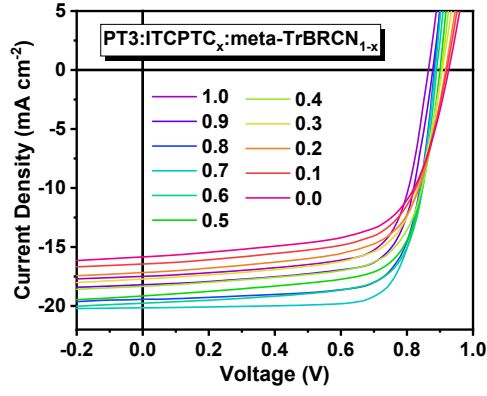

Fig. S6  $J$ - $V$  curves of the PT3:ITCPTC<sub>x</sub>:meta-TrBRCN<sub>1-x</sub> based ternary blend devices.

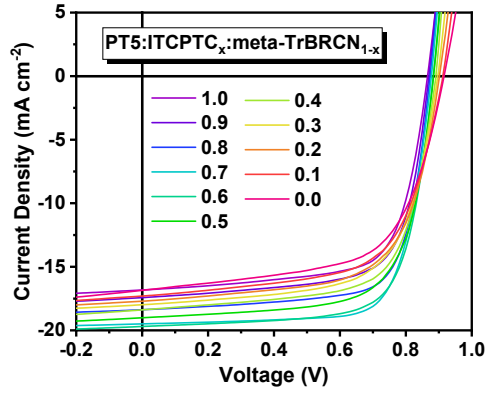

Fig. S7  $J$ - $V$  curves of the PT5:ITCPTC<sub>x</sub>:meta-TrBRCN<sub>1-x</sub> based ternary blend devices.

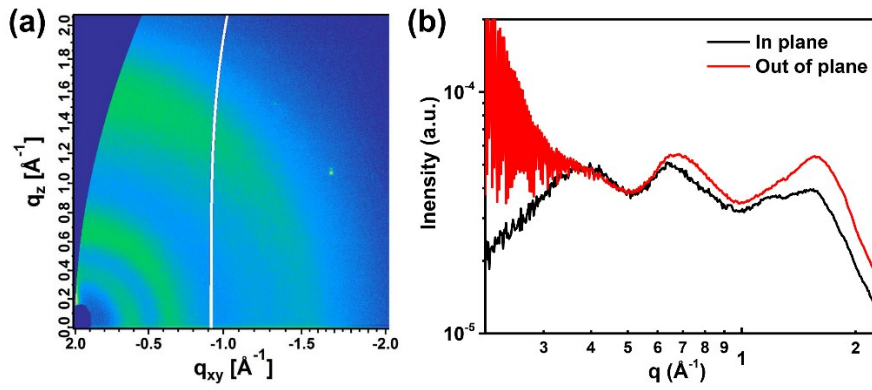

Fig. S8 (a) 2D-GIWAXS pattern of meta-TrBRCN. (b) In-plane and out-of-plane line-cuts.

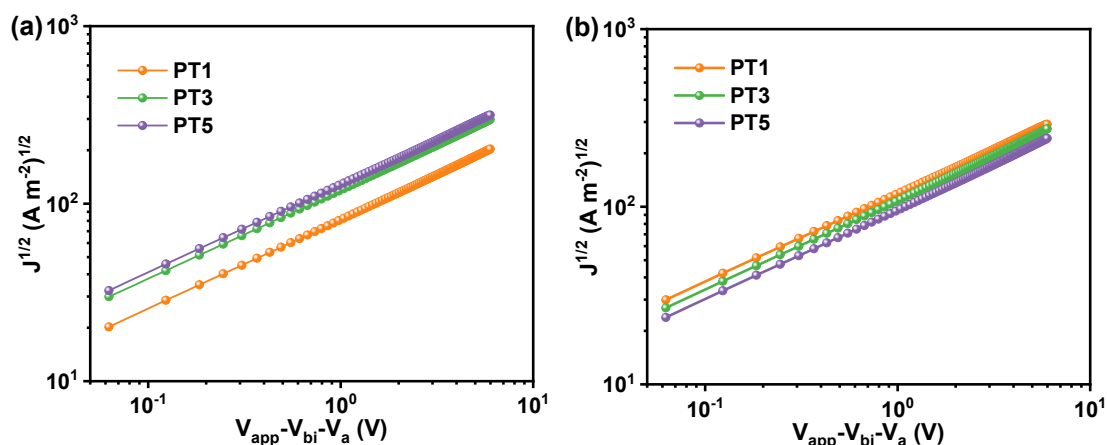

**Fig. S9**  $J^{1/2}$ - $V$  curves of the terpolymer:ITCPTC<sub>0.7</sub>:meta-TrBRCN<sub>0.3</sub> based ternary blend devices with a hole-only device structure of ITO/PEDOT:PSS/ active layer/MoO<sub>3</sub>/Au (a) and an electron-only device structure of Al/active layer/Al (b).

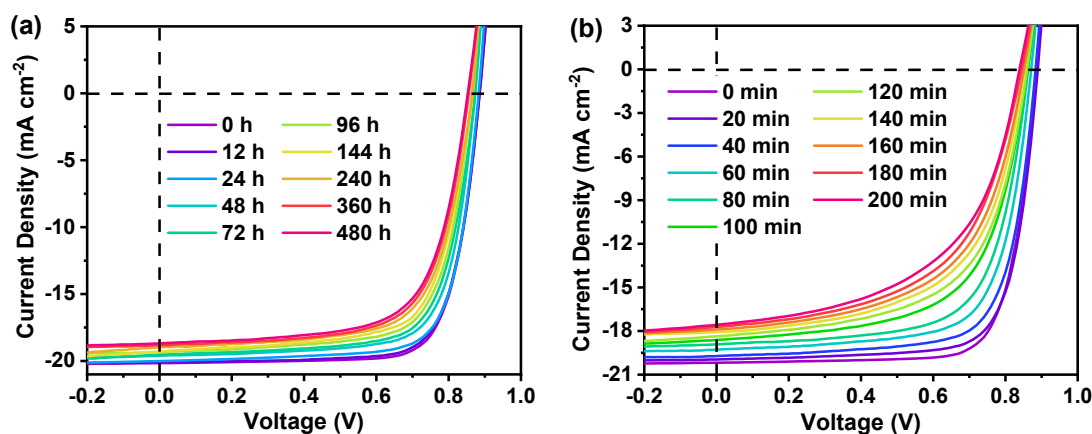

**Fig. S10**  $J$ - $V$  curves of the PT3:ITCPTC<sub>0.7</sub>:meta-TrBRCN<sub>0.3</sub> based ternary blend devices (a) stored in nitrogen filled glove box for different times and (b) heated at 120 °C for different times.

#### 4. Supplementary Tables

**Table S1** Photovoltaic performances of PT1:ITCPTC<sub>x</sub>:meta-TrBRCN<sub>(1-x)</sub> based ternary blend devices under AM 1.5G 100 mW cm<sup>-2</sup> illumination.

| ITCPTC content | $V_{oc}$ (V)               | $J_{sc}$ (mA cm <sup>-2</sup> ) | FF (%)     | PCE (%)      |
|----------------|----------------------------|---------------------------------|------------|--------------|
| 1.0            | 0.874                      | 18.16                           | 69.4       | 11.01        |
|                | (0.870±0.004) <sup>a</sup> | (17.74±0.38)                    | (68.9±0.5) | (10.66±0.35) |
| 0.9            | 0.885                      | 18.74                           | 69.7       | 11.56        |
|                | (0.877±0.008)              | (18.40±0.34)                    | (69.3±0.4) | (11.18±0.38) |
| 0.8            | 0.894                      | 19.32                           | 70.1       | 12.11        |
|                | (0.883±0.011)              | (18.99±0.33)                    | (69.7±0.4) | (11.69±0.52) |

|     |                        |                       |                    |                       |
|-----|------------------------|-----------------------|--------------------|-----------------------|
| 0.7 | 0.903<br>(0.891±0.012) | 19.17<br>(18.87±0.30) | 70.9<br>(70.4±0.5) | 12.27<br>(11.84±0.43) |
| 0.6 | 0.909<br>(0.897±0.012) | 18.63<br>(18.28±0.35) | 68.0<br>(67.5±0.5) | 11.52<br>(11.07±0.45) |
| 0.5 | 0.912<br>(0.903±0.009) | 18.06<br>(17.69±0.37) | 67.3<br>(66.9±0.4) | 11.08<br>(10.69±0.39) |
| 0.4 | 0.916<br>(0.909±0.007) | 17.47<br>(17.13±0.34) | 65.1<br>(64.8±0.3) | 10.41<br>(10.09±0.32) |
| 0.3 | 0.924<br>(0.916±0.008) | 16.98<br>(16.59±0.39) | 63.9<br>(63.6±0.3) | 10.03<br>(9.66±0.37)  |
| 0.2 | 0.929<br>(0.922±0.007) | 16.29<br>(15.93±0.36) | 62.1<br>(61.7±0.4) | 9.40<br>(9.06±0.34)   |
| 0.1 | 0.936<br>(0.928±0.008) | 15.79<br>(15.42±0.37) | 61.8<br>(61.3±0.5) | 9.13<br>(8.77±0.36)   |
| 0.0 | 0.939<br>(0.935±0.004) | 15.35<br>(15.00±0.35) | 60.7<br>(60.2±0.5) | 8.75<br>(8.44±0.31)   |

<sup>a</sup>Average value with standard deviation from 20 devices.

**Table S2** Photovoltaic performances of PT3:ITCPTC<sub>x</sub>:meta-TrBRCN<sub>(1-x)</sub> based ternary blend devices under AM 1.5G 100 mW cm<sup>-2</sup> illumination.

| ITCPTC content | $V_{oc}$ (V)                        | $J_{sc}$ (mA cm <sup>-2</sup> ) | FF (%)             | PCE (%)               |
|----------------|-------------------------------------|---------------------------------|--------------------|-----------------------|
| 1.0            | 0.865<br>(0.861±0.005) <sup>a</sup> | 17.49<br>(17.20±0.29)           | 70.7<br>(70.2±0.5) | 10.69<br>(10.40±0.29) |
| 0.9            | 0.876<br>(0.867±0.009)              | 18.20<br>(17.89±0.31)           | 72.0<br>(71.5±0.5) | 11.48<br>(11.06±0.42) |
| 0.8            | 0.880<br>(0.875±0.007)              | 19.43<br>(19.10±0.33)           | 74.7<br>(74.3±0.4) | 12.78<br>(12.39±0.39) |
| 0.7            | 0.886<br>(0.879±0.007)              | 20.16<br>(19.88±0.28)           | 76.3<br>(75.7±0.6) | 13.63<br>(13.23±0.40) |
| 0.6            | 0.890<br>(0.885±0.005)              | 19.76<br>(19.42±0.34)           | 73.0<br>(72.5±0.5) | 12.83<br>(12.46±0.37) |
| 0.5            | 0.899<br>(0.891±0.008)              | 19.15<br>(18.85±0.30)           | 71.0<br>(70.6±0.4) | 12.22<br>(11.85±0.36) |
| 0.4            | 0.905<br>(0.897±0.008)              | 18.34<br>(18.01±0.33)           | 69.8<br>(69.4±0.4) | 11.59<br>(11.21±0.38) |
| 0.3            | 0.908<br>(0.903±0.005)              | 17.72<br>(17.36±0.36)           | 67.6<br>(67.1±0.5) | 10.88<br>(10.52±0.36) |
| 0.2            | 0.915<br>(0.909±0.006)              | 17.17<br>(16.85±0.32)           | 66.5<br>(66.1±0.4) | 10.45<br>(10.12±0.33) |
| 0.1            | 0.921<br>(0.915±0.006)              | 16.44<br>(16.09±0.35)           | 65.5<br>(65.0±0.5) | 9.92<br>(9.57±0.35)   |
| 0.0            | 0.926<br>(0.921±0.05)               | 15.84<br>(15.53±0.31)           | 64.6<br>(64.1±0.5) | 9.47<br>(9.24±0.23)   |

<sup>a</sup>Average value with standard deviation from 20 devices.



**Table S3** Photovoltaic performances of PT5:ITCPTC<sub>x</sub>:meta-TrBRCN<sub>(1-x)</sub> based ternary blend devices under AM 1.5G 100 mW cm<sup>-2</sup> illumination.

| ITCPTC content | $V_{oc}$ (V)                        | $J_{sc}$ (mA cm <sup>-2</sup> ) | FF (%)             | PCE (%)               |
|----------------|-------------------------------------|---------------------------------|--------------------|-----------------------|
| 1.0            | 0.865<br>(0.857±0.008) <sup>a</sup> | 16.82<br>(16.47±0.35)           | 69.8<br>(69.4±0.4) | 10.15<br>(9.08±0.36)  |
| 0.9            | 0.869<br>(0.862±0.007)              | 17.42<br>(17.08±0.34)           | 70.6<br>(70.3±0.3) | 10.69<br>(9.64±0.39)  |
| 0.8            | 0.874<br>(0.867±0.007)              | 18.38<br>(18.08±0.30)           | 72.8<br>(72.4±0.4) | 11.70<br>(10.67±0.37) |
| 0.7            | 0.877<br>(0.872±0.005)              | 19.49<br>(19.21±0.28)           | 74.4<br>(73.9±0.5) | 12.72<br>(11.79±0.40) |
| 0.6            | 0.882<br>(0.878±0.004)              | 19.69<br>(19.38±0.31)           | 72.2<br>(71.9±0.3) | 12.53<br>(11.64±0.38) |
| 0.5            | 0.885<br>(0.883±0.003)              | 19.01<br>(18.66±0.35)           | 69.2<br>(68.9±0.3) | 11.65<br>(10.94±0.39) |
| 0.4            | 0.891<br>(0.888±0.004)              | 18.39<br>(18.07±0.32)           | 68.3<br>(67.8±0.5) | 11.19<br>(10.50±0.39) |
| 0.3            | 0.897<br>(0.894±0.003)              | 17.98<br>(17.64±0.34)           | 65.7<br>(65.3±0.4) | 10.59<br>(10.06±0.38) |
| 0.2            | 0.902<br>(0.899±0.004)              | 17.71<br>(17.34±0.37)           | 65.1<br>(64.8±0.3) | 10.40<br>(9.88±0.37)  |
| 0.1            | 0.910<br>(0.904±0.006)              | 17.30<br>(16.97±0.33)           | 63.7<br>(63.2±0.5) | 10.03<br>(9.52±0.37)  |
| 0.0            | 0.916<br>(0.910±0.006)              | 16.85<br>(16.51±0.34)           | 62.3<br>(61.9±0.4) | 9.61<br>(9.26±0.36)   |

<sup>a</sup>Average value with standard deviation from 10 devices.

**Table S4** Photovoltaic performances for PT3:ITCPTC<sub>0.7</sub>:meta-TrBRCN<sub>0.3</sub> based ternary blend devices stored in nitrogen filled glove box for different times.

| Time (h) | $V_{oc}$ (V) | $J_{sc}$ (mA cm <sup>-2</sup> ) | FF (%) | PCE (%) |
|----------|--------------|---------------------------------|--------|---------|
| 0        | 0.886        | 20.16                           | 76.3   | 13.63   |
| 12       | 0.886        | 20.10                           | 75.5   | 13.44   |
| 24       | 0.883        | 20.00                           | 75.2   | 13.28   |
| 48       | 0.873        | 19.61                           | 73.7   | 12.61   |
| 72       | 0.873        | 19.61                           | 71.8   | 12.29   |
| 96       | 0.867        | 19.32                           | 71.4   | 11.96   |
| 144      | 0.866        | 19.29                           | 70.0   | 11.70   |
| 240      | 0.864        | 18.98                           | 68.8   | 11.28   |
| 360      | 0.856        | 18.82                           | 68.4   | 11.02   |
| 480      | 0.853        | 18.68                           | 67.7   | 10.79   |

**Table S5** Photovoltaic performances for PT3:ITCPTC<sub>0.7</sub>:meta-TrBRCN<sub>0.3</sub> based ternary blend devices heated at 120 °C for different times.

| Time (min) | $V_{oc}$ (V) | $J_{sc}$ (mA cm <sup>-2</sup> ) | FF (%) | PCE (%) |
|------------|--------------|---------------------------------|--------|---------|
| 0          | 0.886        | 20.18                           | 76.0   | 13.59   |
| 20         | 0.890        | 20.00                           | 75.2   | 13.39   |
| 40         | 0.881        | 19.71                           | 73.9   | 12.83   |
| 60         | 0.869        | 19.28                           | 71.1   | 11.91   |
| 80         | 0.863        | 18.92                           | 67.0   | 10.94   |
| 100        | 0.862        | 18.62                           | 63.1   | 10.12   |
| 120        | 0.857        | 18.37                           | 60.5   | 9.52    |
| 140        | 0.851        | 18.07                           | 58.6   | 9.01    |
| 160        | 0.848        | 17.89                           | 57.2   | 8.68    |
| 180        | 0.844        | 17.71                           | 55.9   | 8.36    |
| 200        | 0.840        | 17.60                           | 54.6   | 8.07    |

## 5. References

- 1 Xu, X. P.; Zhang, G. J.; Zhao, Y. Z.; Liu, J.; Li, Y.; Peng, Q. Highly Efficient Random Terpolymers for Photovoltaic Applications with Enhanced Absorption and Molecular Aggregation. *Chin. J. Polym. Sci.* 2017, **35**, 249-260.
- 2 Wu, W. L.; Zhang, G. J.; Xu, X. P.; Wang, S. C.; Li, Y.; Peng, Q. Wide Bandgap Molecular Acceptors with a Truxene Core for Efficient Nonfullerene Polymer Solar Cells: Linkage Position on Molecular Configuration and Photovoltaic Properties. *Adv. Funct. Mater.* 2018, **28**, 1707493.
